# Supplementary material
Source: PubMed Central journal article supplement (PMC8811633)
Supplement: EMBR-23-e51287-s008.pdf [file EMBR-23-e51287-s008.pdf]

## Expanded View Figures

### Figure EV1. Transcriptional regulation of HES1 by RASSF1A.

- A Analysis of TCGA RNA-seq data from clinical samples expressing highest (LAML) and lowest (ESCA) RASSF1A levels to identify transcription factors following RASSF1A expression. One of the most prominent hits was the HES1 repressor GATA1 ( $P < 0.00001$ ).
- B Top: qPCR for HES1 levels in U2OS cells transfected with non-targeting (siCTRL) or GATA1-targeting (siGATA1) siRNA. Bottom: qPCR for GATA1 levels verifying successful KD.
- C qPCR for GATA1 levels in U2OS cells transfected with either siCTRL or RASSF1A-targeting (siRASSF1A) siRNA. Western blotting for RASSF1A levels demonstrates knockdown efficiency.
- D qPCR for GATA1 levels in U2OS cells transfected with pCDNA3 or FLAG-RASSF1A. Western blotting demonstrates FLAG-RASSF1A induction.

Data information: Tumor type abbreviations: LAML: Acute Myeloid Leukemia; ESCA: Esophageal carcinoma.  $**P < 0.01$ , of Student's *t*-test. Error bars indicate s.e.m. Data shown are representative of three biological replicates ( $n = 3$ ).

Source data are available online for this figure.

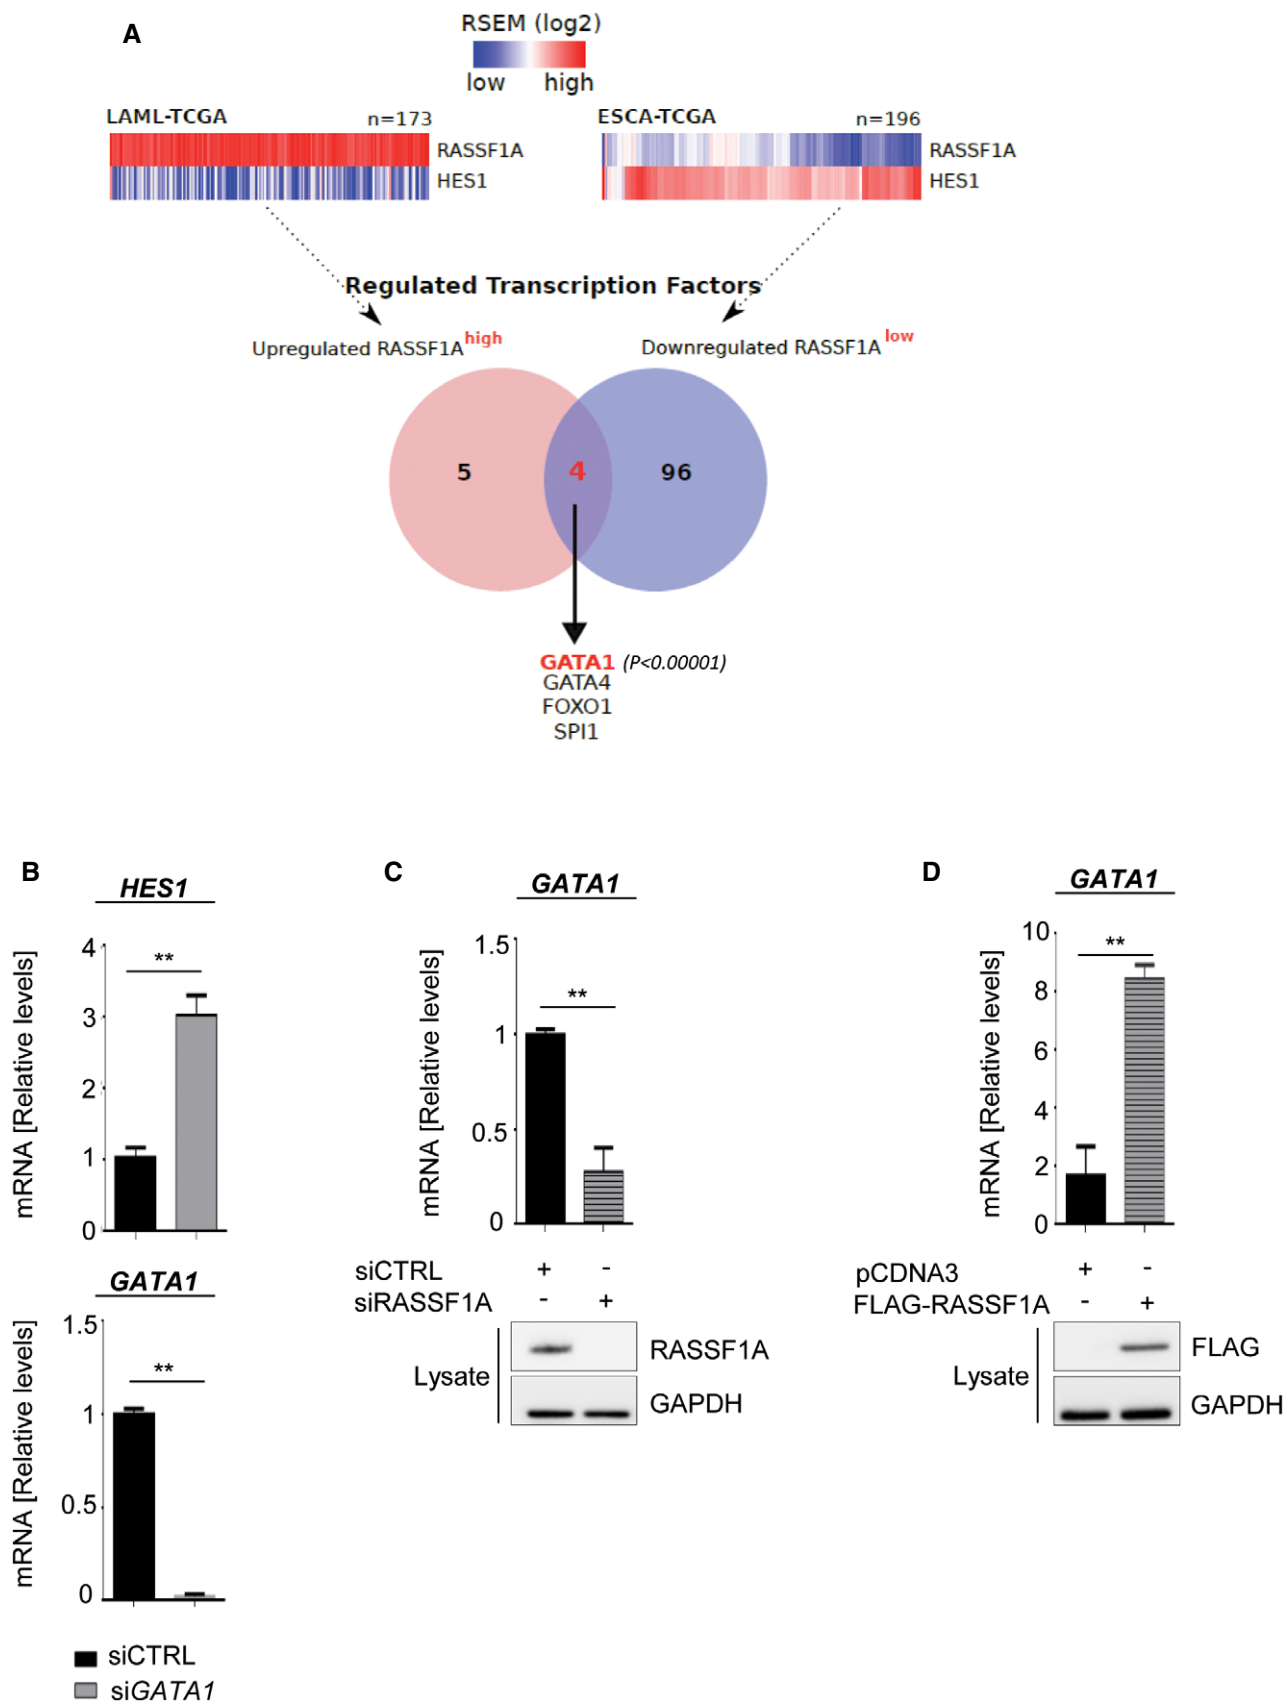

Figure EV1.

**Figure EV2. RASSF1A-mediated ubiquitination of HES1.**

- A Densitometry on Fig 1G showing that only nuclear HES1 levels are significantly reduced upon RASSF1A induction, based on the nuclear HES1/LAMIN B1 ratio. Cytoplasmic HES1 levels remain unaffected based on the cytoplasmic HES1/GAPDH ratio.
- B *In vivo* ubiquitination assay in HES1 immunoprecipitates from nuclear and cytoplasmic fractions of U2OS cells Tet-On inducibly expressing FLAG-RASSF1A versus Control. Doxycycline (DOX) was used at a concentration of 0.5 µg/ml for 24 h. Immunoprecipitates and Input lysates are probed with displayed antibodies.
- C *In vivo* ubiquitination assay in HES1 immunoprecipitates from nuclear and cytoplasmic fractions of U2OS cells transfected with either siCTRL or siRASSF1A. Immunoprecipitates and Input lysates are probed with displayed antibodies.

Data information: \*\* $P < 0.01$ , of Student's *t*-test. Error bars indicate s.e.m. Data shown are representative of three biological replicates ( $n = 3$ ). Source data are available online for this figure.

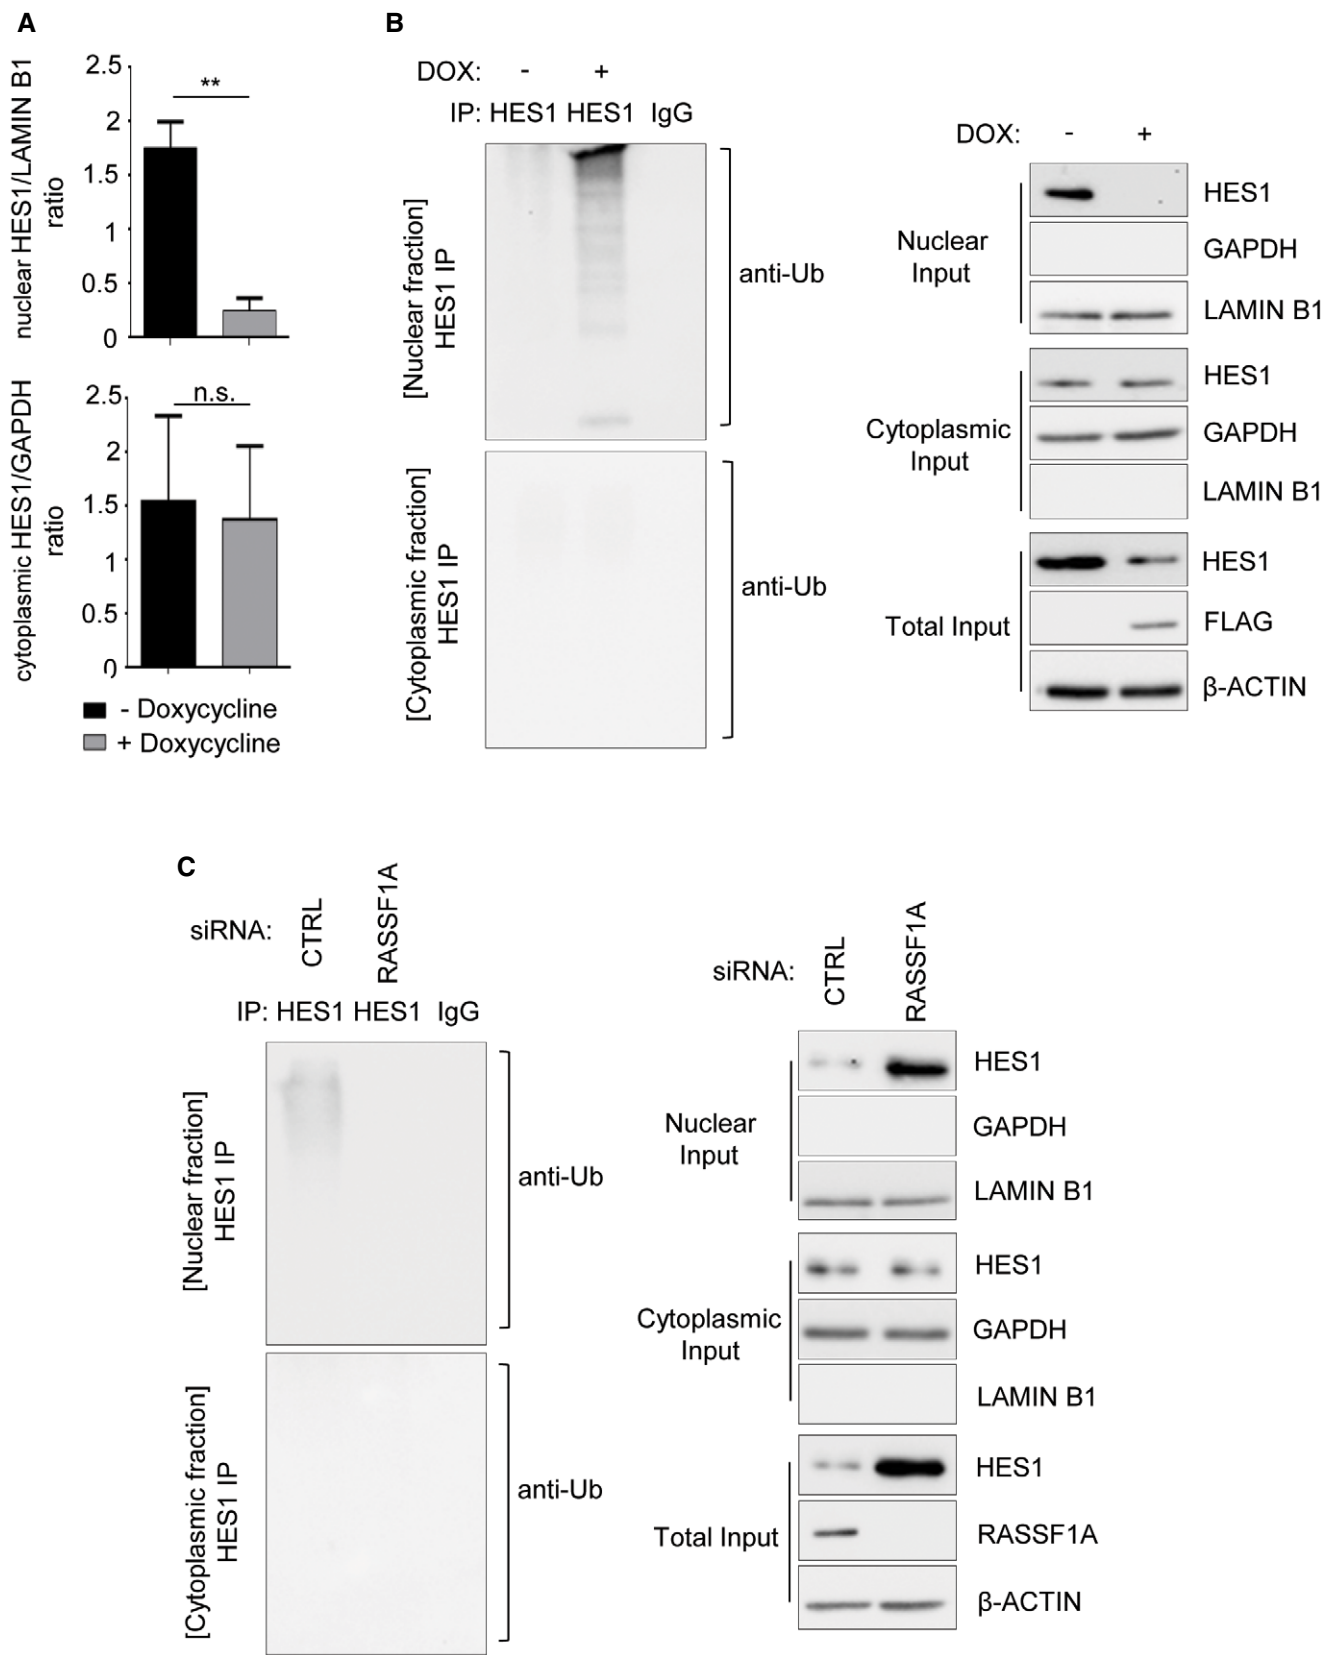

Figure EV2.

**Figure EV3. RASSF1A regulates the core pluripotency markers in cancer.**

- A Western blotting and densitometry for core pluripotency marker expression in HeLa cells transfected with either non-targeting siRNA (siCTRL) or siRNA against RASSF1A (siRASSF1A).
- B Immunofluorescence for core pluripotency marker expression in HeLa cells transfected with either siCTRL or siRASSF1A.
- C qPCR for core stem cell marker levels in U2OS and HeLa cells in response to siRASSF1A versus siCTRL.
- D Immunoblotting and densitometry for core pluripotency marker expression in U2OS cells transfected with either siCTRL or siRASSF1A.
- E U2OS cells Tet-On inducibly expressing FLAG-RASSF1A were treated with 0.5 µg/ml of doxycycline for 24 h. Cells were subsequently lysed and lysates were immunoblotted with the indicated antibodies. Densitometry is provided for displayed Western blot images.

Data information: Scale bars: 20 µm. \* $P < 0.05$ , \*\* $P < 0.01$ , and \*\*\* $P < 0.001$ , of Student's *t*-test. Error bars indicate s.e.m. Data shown are representative of three biological replicates ( $n = 3$ ).

Source data are available online for this figure.

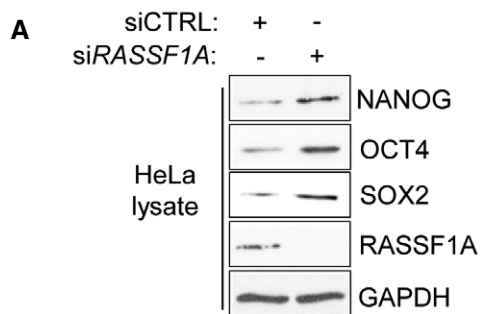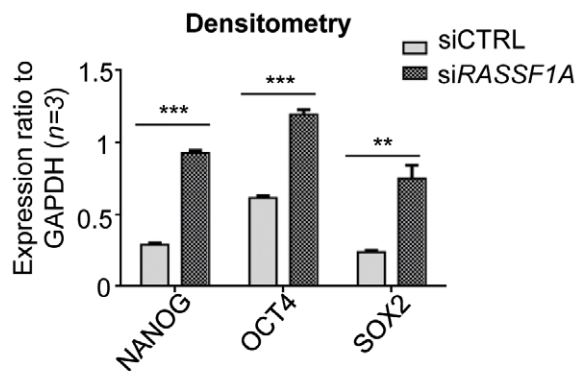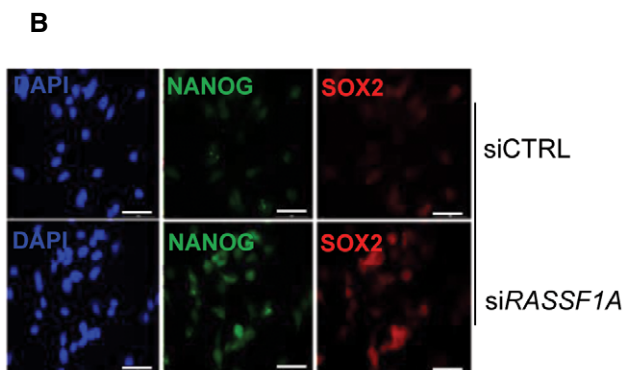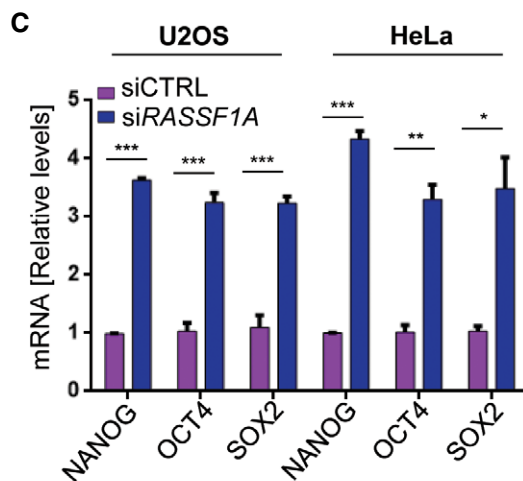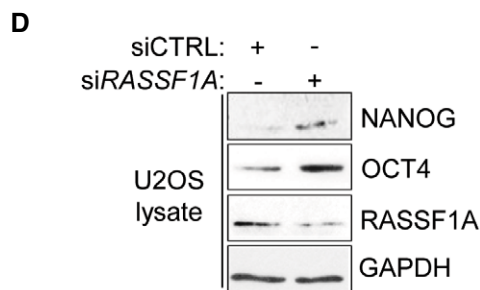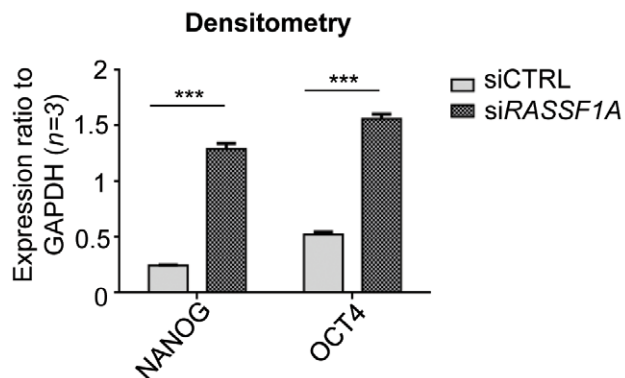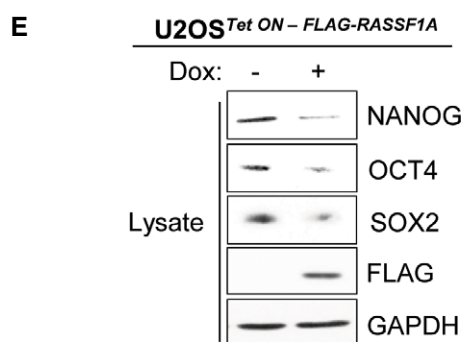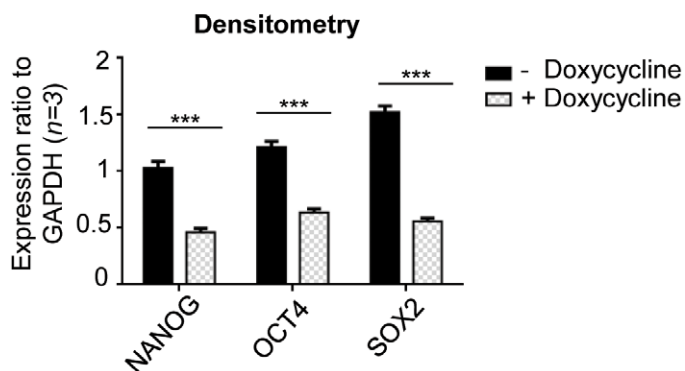

Figure EV3.

**Figure EV4. RASSF1A induction confers a differentiation phenotype accompanied by HES1 inactivation in cancer cells.**

- A H1299 cells transfected with either pCDNA3 or FLAG-RASSF1A and subjected to Matrigel 2D differentiation assay. RASSF1A expression induces differentiation as indicated by changes in the round shape and reduction of stem cell markers assessed by immunofluorescence.
- B Quantification of NANOG and SOX2 signal intensities from (A).
- C H1299 cells transfected with either pCDNA3 or FLAG-RASSF1A were lysed and probed with the indicated antibodies confirming a reciprocal HES1/RNF4 regulation in response to RASSF1A.
- D HeLa cells transfected with either siCTRL or siRASSF1A were subjected or not to treatment with the GSI DBZ (100 nM) and their lysates were immunoblotted against indicated antibodies. Cleaved Notch (ICN1) levels were used as readout of DBZ treatment.
- E qPCR for HES1 mRNA levels in ESC in response to the  $\gamma$ -secretase inhibitor DBZ (100 nM) or the Notch ligand DLL4 (1  $\mu$ g/ml).

Data information: Scale bars: 50  $\mu$ m. \*\*\* $P$  < 0.001, of Student's  $t$ -test. Error bars indicate s.e.m. Data shown are representative of three biological replicates ( $n = 3$ ). Source data are available online for this figure.

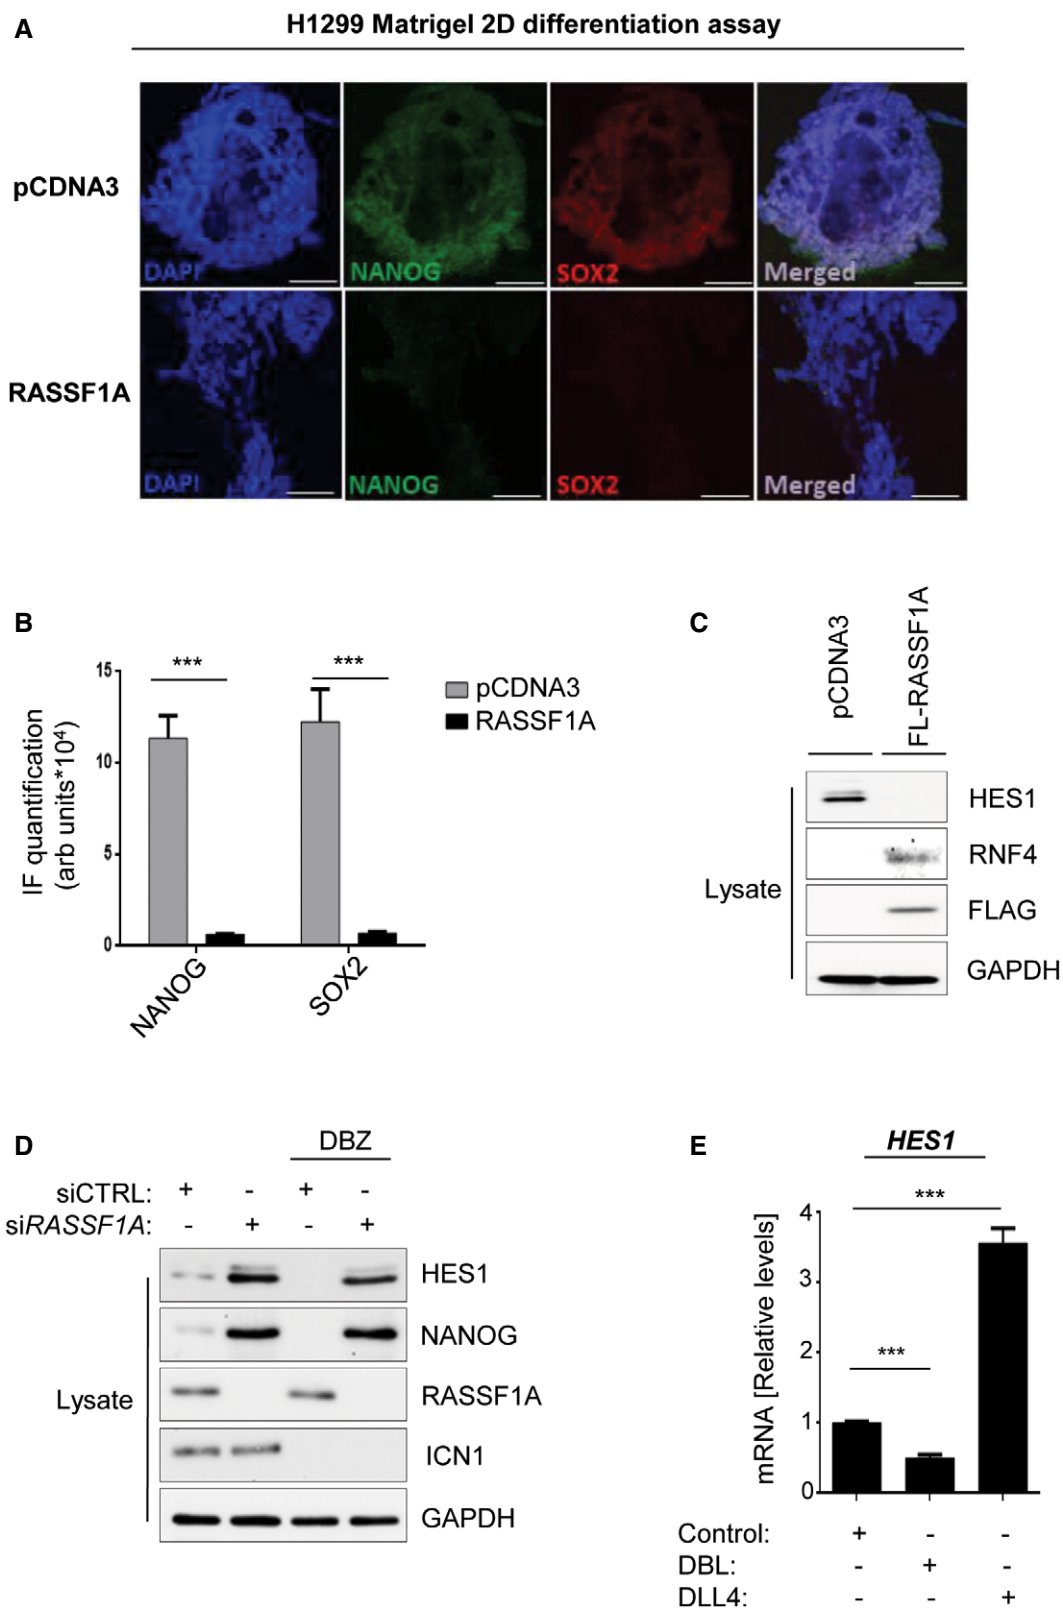

Figure EV4.



**Figure EV5. HES1 activates core pluripotency marker expression in cancer cells and is regulated by RASSF1A independently of the Hippo pathway.**

- A U2OS cells or HeLa cells transfected with the indicated siRNAs were lysed and probed with shown antibodies. HES1 levels increase in response to RASSF1A loss regardless of YAP/TAZ signaling.
- B U2OS cells or HeLa cells transfected with the indicated plasmids were lysed and Western blotted with displayed antibodies. HES1 levels decrease in response to RASSF1A induction regardless of YAP activity.
- C qPCR for core pluripotency markers in U2OS and HeLa cells transfected with siCTRL, siRASSF1A, or siRASSF1A/siHES1. HES1 silencing reverses pluripotency marker increase observed upon RASSF1A loss. Immunoblotting from U2OS and HeLa cell lysates using the indicated antibodies demonstrates KD efficiencies.
- D qPCR for core pluripotency markers in U2OS and HeLa cells transfected with either pCDNA3 or GFP-HES1. HES1 induction increases all core pluripotency marker levels. Western blotting from U2OS and HeLa cell lysates using the indicated antibodies demonstrates efficient HES1 induction.

Data information: \*\*\* $P < 0.001$ , \*\* $P < 0.01$ , and \* $P < 0.05$ , of Student's  $t$ -test. Error bars indicate s.e.m. Data shown are representative of three biological replicates ( $n = 3$ ).

Source data are available online for this figure.

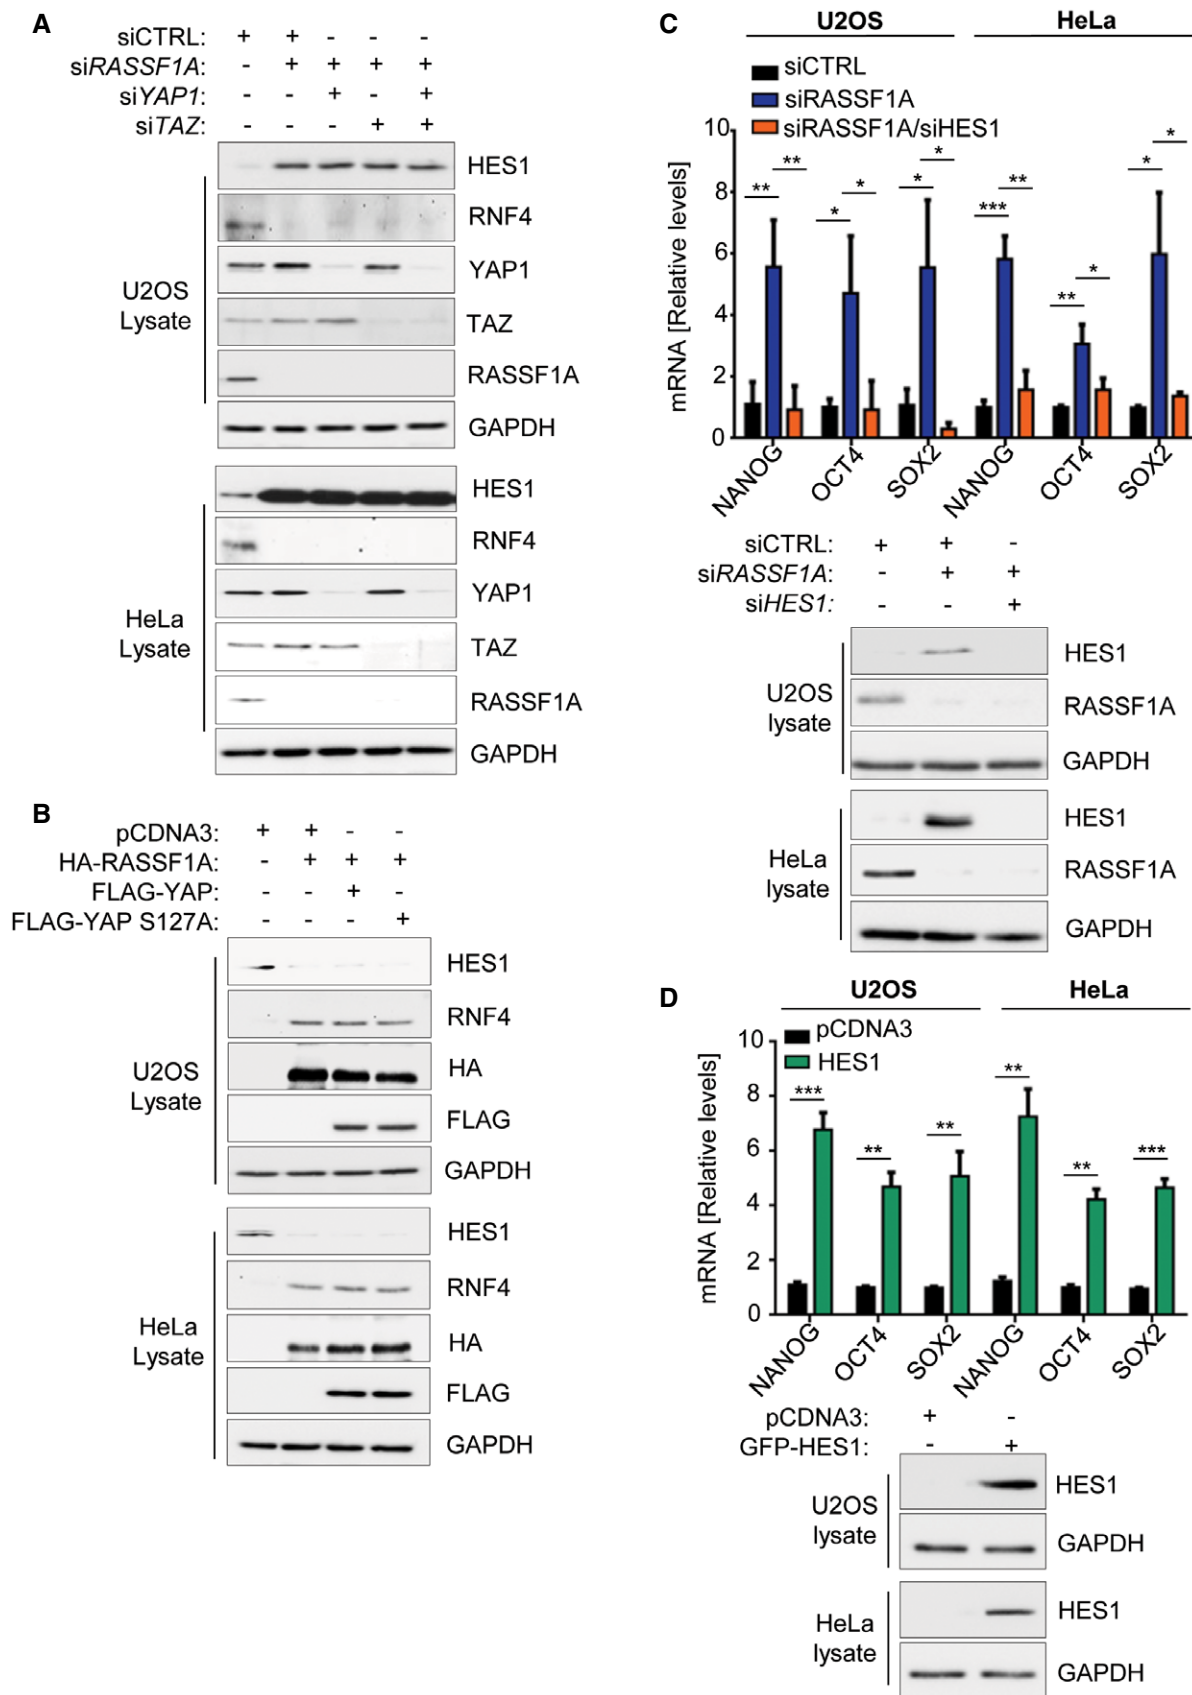

Figure EV5.
