# Supplementary material
Source: PubMed Central journal article supplement (PMC8811633)

Figure 2

Panel A

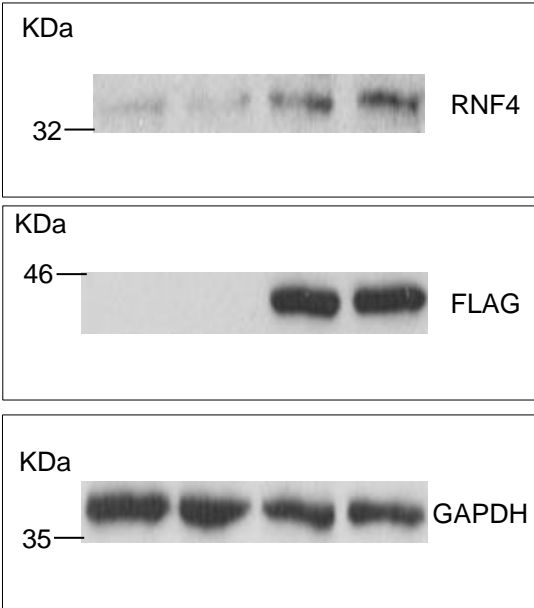

Panel B

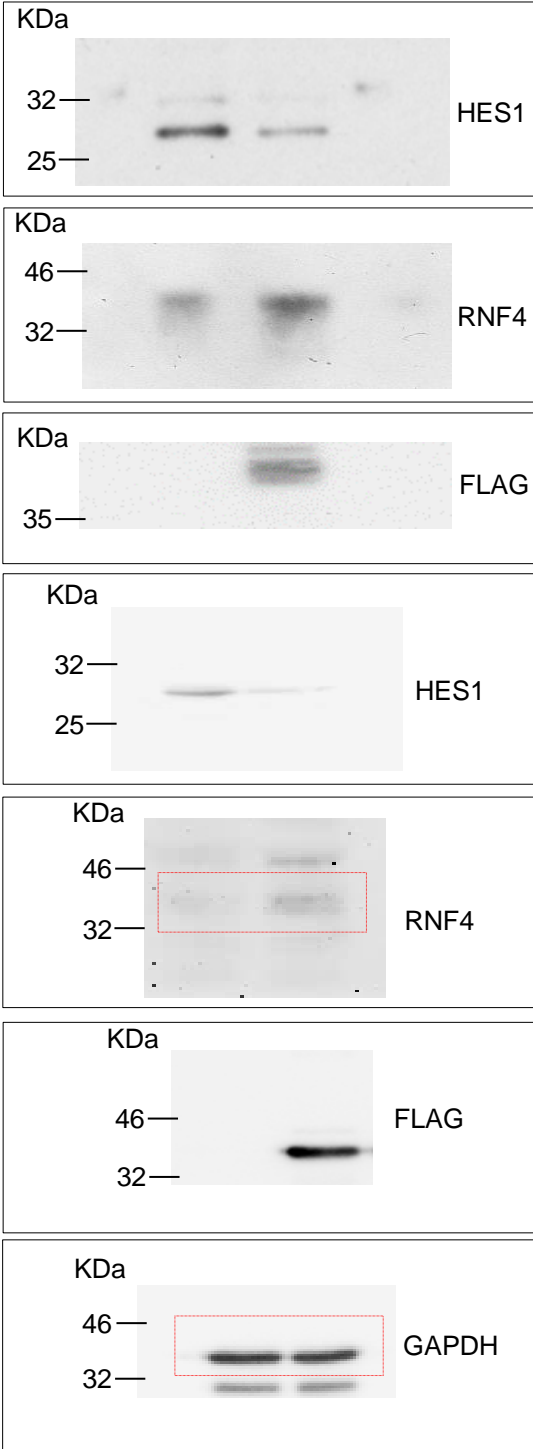

Figure 2

Panel C

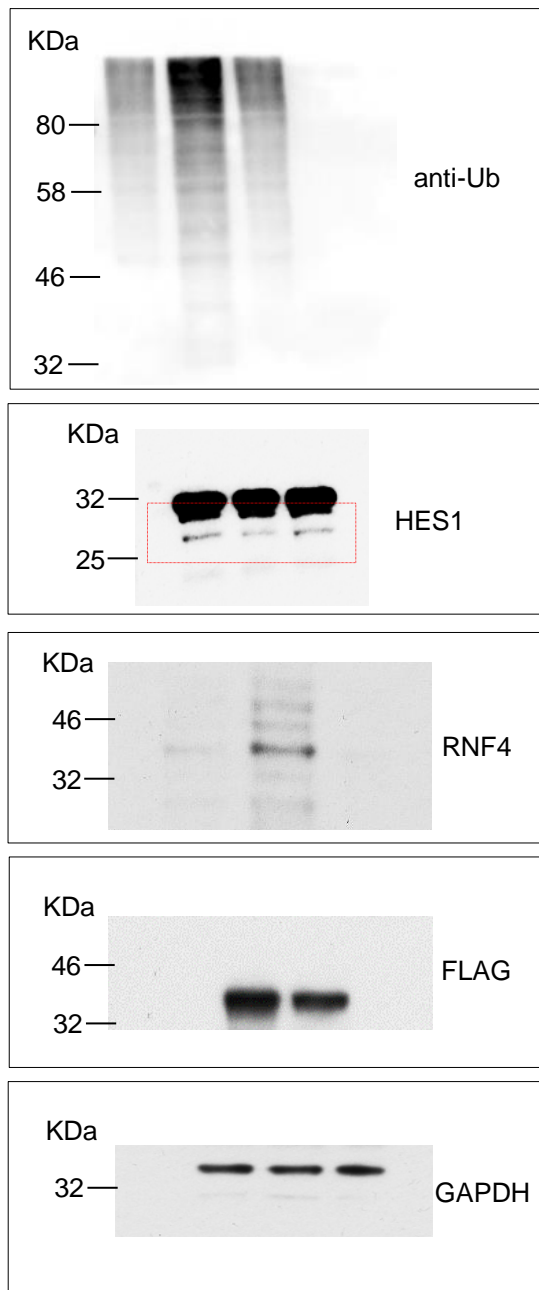

Panel D

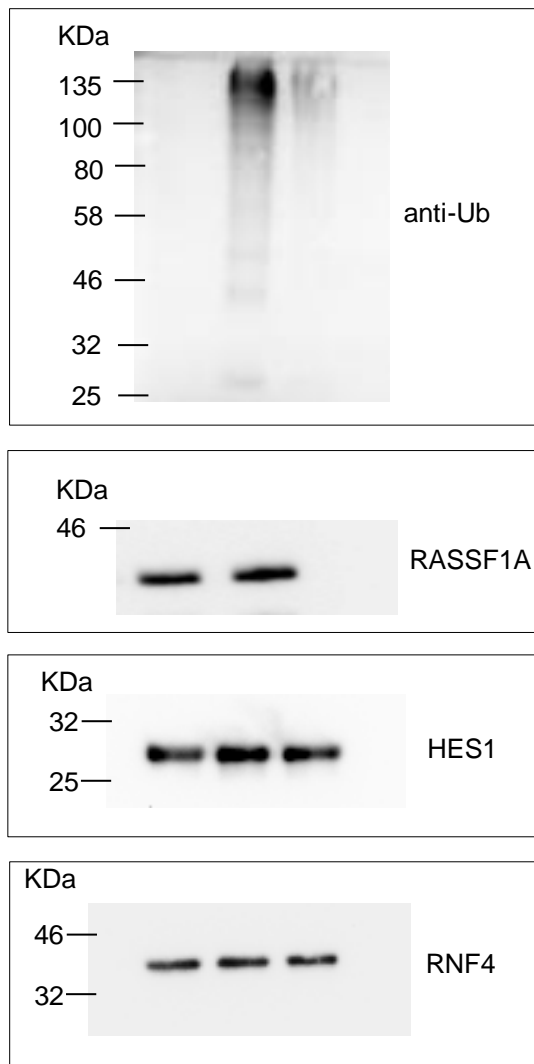

Supplement: EMBR-23-e51287-s001.pdf [file EMBR-23-e51287-s001.pdf]

Figure 3

Panel C

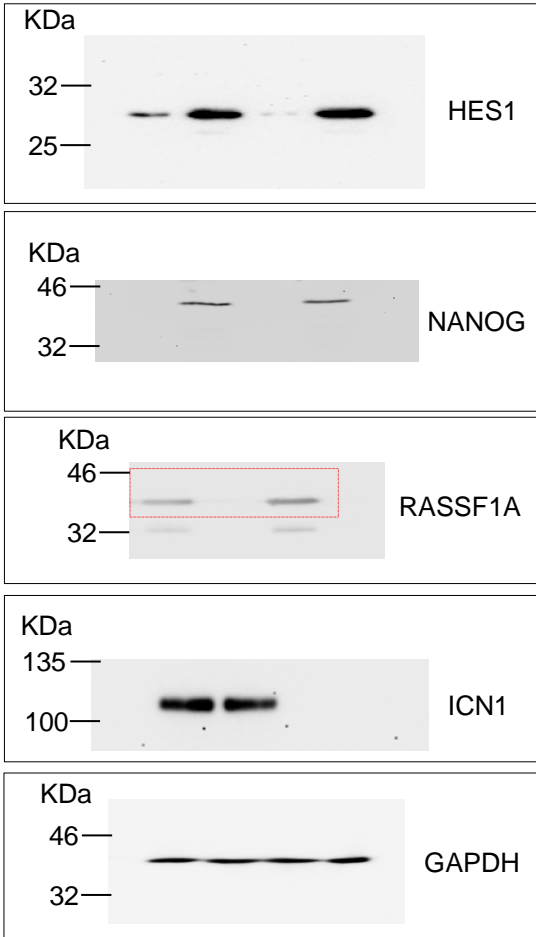

Supplement: EMBR-23-e51287-s002.pdf [file EMBR-23-e51287-s002.pdf]

Figure 1

Panel F

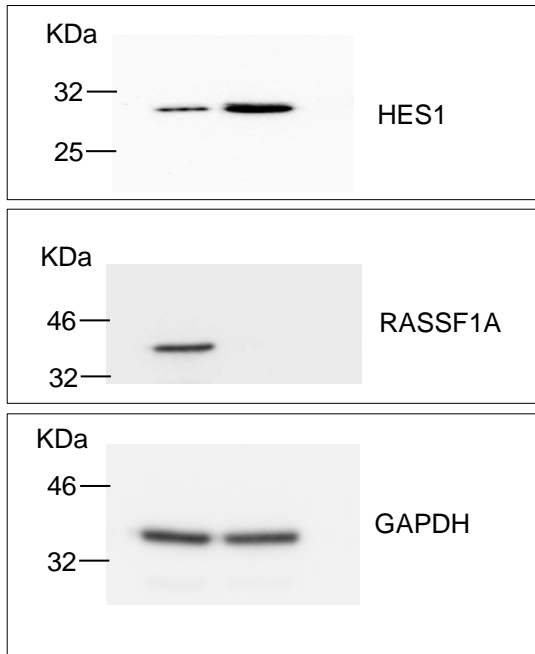

Panel G

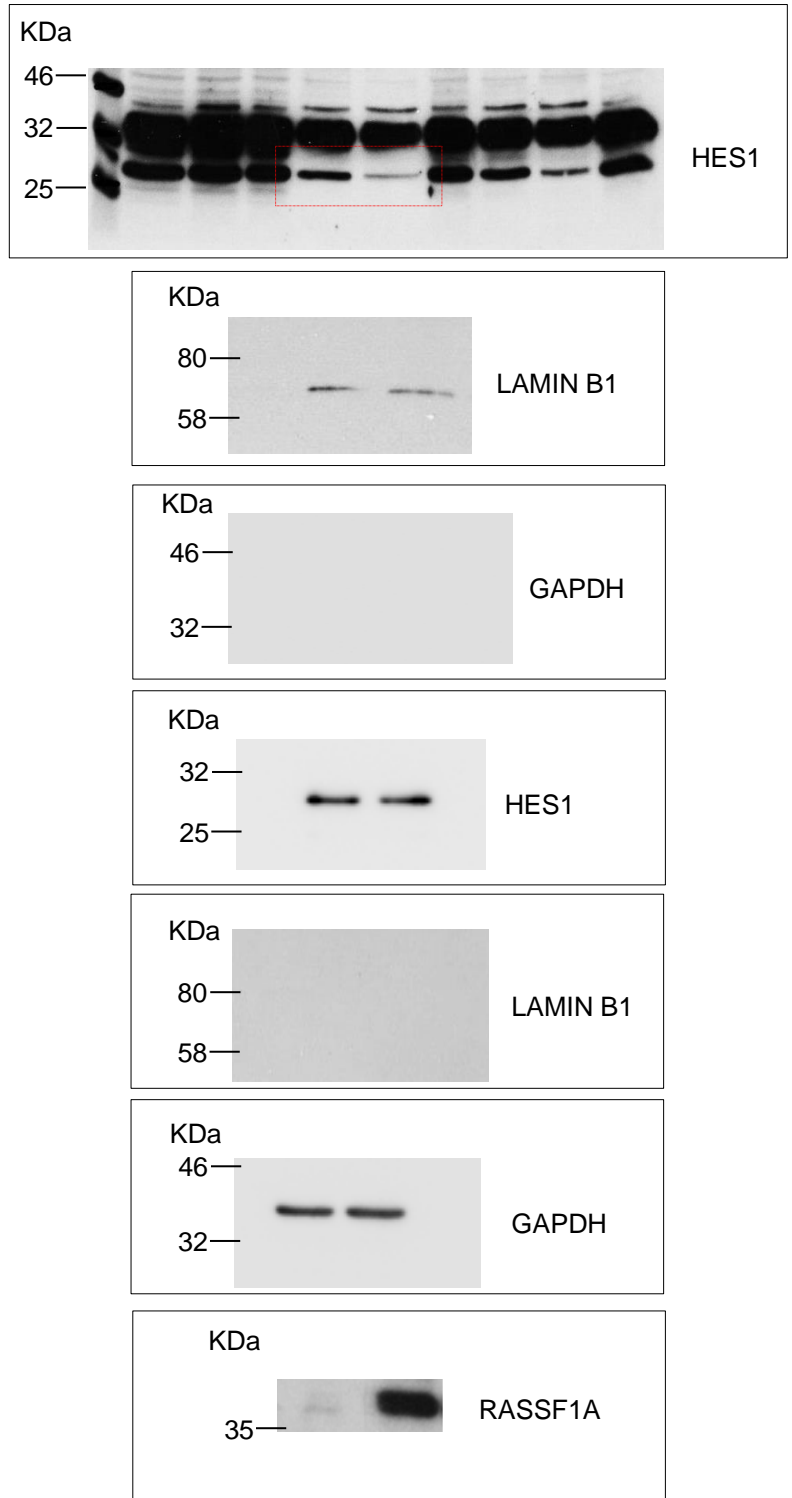

Supplement: EMBR-23-e51287-s006.pdf [file EMBR-23-e51287-s006.pdf]
